# Supplementary material for: miRTex: A Text Mining System for miRNA-Gene Relation Extraction
Source: PLoS Comput Biol. 2015 Sep 25;11(9):e1004391. doi: 10.1371/journal.pcbi.1004391 (PMC4583433; doi:10.1371/journal.pcbi.1004391)
Supplement: S2 Table — The table contains miRNA-gene regulation and miRNA-target relations extracted by miRTex for the TNBC use case. The coverage of TarBase 7.0 and miR2Disease on these relations are also included in the table. Conversely, TarBase 7.0 miRNA-gene relations are sampled by searching for the 252 down-regulated genes in the TNBC use case, and all miR2Disease miRNA-gene relations were downloaded from its website. Among these TarBase 7.0/miR2Disease relations, those whose miRNA and gene can be found in the associated abstracts are included in the table. miRTex coverage on these relations are also included. (XLSX) [file pcbi.1004391.s002.xlsx]

## Sheet: miRTex_for_TNBC
miRNA	Relation	Gene	Method	TarBase?	miR2Disease?	PMIDs		Note
let-7c	targets	IGF1R	tnbc down genes	yes	no	23503464		This sheet contains miRTex relations for the TNBC use case, and whether these relations can be found in TarBase 7.0 or miR2Disease
let-7i	targets	IGF1R	tnbc down genes	yes	no	25305490
miR-1	regulates	AR	tnbc down genes	no	no	24222130
miR-100	regulates	IGF1R	tnbc down genes	yes	no	24030073
miR-122	regulates	FOXA1	tnbc down genes	no	no	23834235
miR-122	targets	IGF1R	tnbc down genes	yes	no	19726678, 23056576
miR-124	targets	AR	tnbc down genes	yes	no	23069658
miR-124a	regulates	AR	tnbc down genes	no	no	22386953
miR-124a	regulates	GLI3	tnbc down genes	no	no	19703558
miR-125a	regulates	ERBB3	tnbc down genes	yes	breast cancer	17110380, 23519125
miR-125b	targets	BCL2	tnbc down genes	yes	no	22139839
miR-125b	targets	BMPR1B	tnbc down genes	yes	breast cancer	19738052
miR-125b	regulates	ERBB3	tnbc down genes	yes	breast cancer	17110380, 23519125, 23146892
miR-125b	regulates	MDM2	tnbc down genes	no	no	23585871
miR-125b	regulates	NRIP1	tnbc down genes	yes	no	21375733
miR-126	regulates	GATA3	tnbc down genes	no	no	19843690
miR-126-3p	targets	PGR	tnbc down genes	yes	no	21526342
miR-1271	targets	BCL2	tnbc down genes	yes	no	24875127
miR-1271	targets	IGF1R	tnbc down genes	no	no	24875127
miR-128	regulates	BCL2	tnbc down genes	no	no	21143953
miR-129	regulates	BCL2	tnbc down genes	no	no	23744359
miR-1290	targets	KIF13B	tnbc down genes	no	no	23142292
miR-1290	targets	NAT1	tnbc down genes	no	no	23183268, 25528056
miR-130a	regulates	BCL2	tnbc down genes	no	no	24750349
miR-132	regulates	BCL2	tnbc down genes	yes	no	23880186
miR-133a	targets	IGF1R	tnbc down genes	no	no	24127040
miR-133b	regulates	IGF1R	tnbc down genes	yes	no	24391788
miR-135b	regulates	GATA3	tnbc down genes	no	no	22042699
miR-137	regulates	BCL2	tnbc down genes	no	no	23151846
miR-140	targets	IGF1R	tnbc down genes	no	no	24039995
miR-140-3p	targets	NRIP1	tnbc down genes	yes	no	21798241
miR-140-5p	targets	ERBB4	tnbc down genes	no	no	24530397, 25538945
miR-141	targets	AR	tnbc down genes	no	no	22314666
miR-142-3p	regulates	ERBB4	tnbc down genes	no	no	20420713
miR-143	targets	BCL2	tnbc down genes	yes	no	21693658, 19284987, 25492481
miR-143	targets	GLI3	tnbc down genes	no	no	23895853
miR-143	targets	IGF1R	tnbc down genes	no	no	25492481
miR-143	targets	MDM2	tnbc down genes	no	no	22330136
miR-145	targets	MDM2	tnbc down genes	no	no	22330136
miR-146a	targets	ERBB4	tnbc down genes	yes	no	20495188
miR-146a	regulates	GATA3	tnbc down genes	no	no	23796062
miR-148a	targets	ERBB3	tnbc down genes	no	no	23554686
miR-15	targets	BCL2	tnbc down genes	yes	acute promyelocytic leukemia, chronic lymphocytic leukemia, gastric cancer	16166262, 17894887, 20071661
miR-150	targets	MYB	tnbc down genes	yes	no	24086639, 23604034, 19615744, 23079661
miR-152	targets	ERBB3	tnbc down genes	no	no	23958847
miR-155	regulates	BCL2	tnbc down genes	yes	no	22139839
miR-15a	targets	BCL2	tnbc down genes	yes	no	17707831, 16166262, 16616063, 17260024, 21118128
miR-15a	targets	MYB	tnbc down genes	yes	chronic myeloid leukemia	23963825
miR-15b	targets	BCL2	tnbc down genes	yes	no	18449891, 22374434
miR-16	targets	BCL2	tnbc down genes	yes	chronic lymphocytic leukemia, gastric cancer, hepatocellular carcinoma	16166262, 17894887, 24463077, 24418124, 18449891, 22384141, 22374434, 20643754, 20428827
miR-16	targets	IGF1R	tnbc down genes	yes	no	23507142
miR-16-1	regulates	BCL2	tnbc down genes	no	acute promyelocytic leukemia, chronic lymphocytic leukemia	17707831, 16616063, 17260024, 16166262, 21118128
miR-17	targets	BCL2	tnbc down genes	yes	no	24280866
miR-17	regulates	FOXA1	tnbc down genes	no	no	24486549
miR-17-3p	targets	GALNT7	tnbc down genes	yes	no	23418359
miR-17-3p	targets	MDM2	tnbc down genes	yes	no	23391506
miR-17-5p	regulates	AR	tnbc down genes	no	no	23095762
miR-181	targets	BCL2	tnbc down genes	yes	no	24379987
miR-181a	targets	PGR	tnbc down genes	yes	no	22492871
miR-181b	targets	BCL2	tnbc down genes	yes	no	20162574, 21636858
miR-181b	targets	MDM2	tnbc down genes	no	no	25151861
miR-182	targets	BCL2	tnbc down genes	yes	no	22848417
miR-184	targets	BCL2	tnbc down genes	no	no	24157866
miR-185	regulates	ERBB4	tnbc down genes	no	no	20420713
miR-18a	targets	ESR1	tnbc down genes	yes	no	19027010, 20080637
miR-18b	targets	MDM2	tnbc down genes	no	no	23365201
miR-19	regulates	RHOB	tnbc down genes	yes	no	21527938
miR-191	regulates	ESR1	tnbc down genes	yes	no	23542418
miR-192	regulates	MDM2	tnbc down genes	no	no	20951946
miR-193a	regulates	ERBB4	tnbc down genes	no	no	23588298
miR-193a	targets	MDM2	tnbc down genes	yes	no	23223432
miR-193a-3p	targets	ERBB4	tnbc down genes	no	no	25391651
miR-194	regulates	DACH1	tnbc down genes	no	no	24398877
miR-194	regulates	MDM2	tnbc down genes	no	no	20951946
miR-195	targets	BCL2	tnbc down genes	yes	no	22328513, 22123611
miR-195	targets	IGF1R	tnbc down genes	yes	no	24874051
miR-199a	regulates	ERBB3	tnbc down genes	no	no	23146892
miR-19a	targets	ESR1	tnbc down genes	yes	no	20080637
miR-200	regulates	GATA3	tnbc down genes	yes	no	21403400
miR-200	regulates	IGFBP4	tnbc down genes	no	no	21822286
miR-200a	regulates	TSPAN1	tnbc down genes	no	no	23938385
miR-200b	targets	BCL2	tnbc down genes	yes	no	21993663
miR-200c	targets	IKBKB	tnbc down genes	yes	no	24755559
miR-205	targets	AR	tnbc down genes	no	no	23571738
miR-205	regulates	BCL2	tnbc down genes	yes	no	23612742
miR-205	targets	ERBB3	tnbc down genes	yes	breast cancer	19238171, 19244118, 23638671, 23519125
miR-205-5p	regulates	BCL2	tnbc down genes	yes	no	23629002
miR-206	targets	BCL2	tnbc down genes	no	no	24855559
miR-206	targets	FRS2	tnbc down genes	no	no	24855559
miR-206	targets	IGF1R	tnbc down genes	no	no	24855559
miR-20a	targets	FOXA1	tnbc down genes	yes	no	25210495
miR-21	targets	BCL2	tnbc down genes	yes	breast cancer, vascular disease	21326627
miR-21	regulates	ERBB4	tnbc down genes	no	no	20420713
miR-21	regulates	MPV17	tnbc down genes	no	no	22344686
miR-21	targets	RHOB	tnbc down genes	yes	no	21347332, 21872591, 23313253, 22371328, 20460403, 23826144
miR-211	regulates	MDM2	tnbc down genes	no	no	22235338
miR-214	regulates	GALNT7	tnbc down genes	yes	no	22399294
miR-219-5p	regulates	PGR	tnbc down genes	no	no	22378788
miR-22	targets	ERBB3	tnbc down genes	yes	no	22510010, 24710937, 22484852
miR-22	targets	ESR1	tnbc down genes	yes	breast cancer	18347134
miR-22	regulates	NRIP1	tnbc down genes	no	no	21798241
miR-221	targets	BBC3	tnbc down genes	yes	no	24993451
miR-221	targets	MDM2	tnbc down genes	yes	no	20576614, 24324033
miR-223	targets	IGF1R	tnbc down genes	yes	no	23325891, 24324762, 22424712
miR-224	regulates	ERBB4	tnbc down genes	no	no	20420713
miR-23	targets	BCL2	tnbc down genes	yes	no	21606961
miR-23a	regulates	BCL2	tnbc down genes	no	no	23904466
miR-24-2	targets	BCL2	tnbc down genes	yes	no	22328513
miR-25	targets	MDM2	tnbc down genes	yes	no	22431589
miR-29	targets	MYB	tnbc down genes	yes	no	21187425
miR-291b-3p	regulates	BCL2	tnbc down genes	no	no	24685524
miR-30	targets	MYB	tnbc down genes	no	no	21187425
miR-302b	targets	ERBB4	tnbc down genes	no	no	24438167
miR-30b	targets	BCL2	tnbc down genes	no	no	24293274
miR-31	regulates	BCL2	tnbc down genes	no	no	23364795
miR-32	targets	MDM2	tnbc down genes	no	no	22431589
miR-320	regulates	IGF1R	tnbc down genes	yes	no	24161401
miR-33	targets	ATP8B1	tnbc down genes	no	no	22767443
miR-33	targets	NRIP1	tnbc down genes	yes	no	23316322
miR-34	regulates	MDM2	tnbc down genes	yes	no	23314612
miR-34a	regulates	AR	tnbc down genes	no	no	23145211
miR-34a	targets	BCL2	tnbc down genes	yes	non small cell lung cancer, pancreatic cancer, neuroblastoma, Alzheimer's Disease	18505919, 23948100, 20687223, 23416168, 19683563, 23035210
miR-34a	regulates	ERBB4	tnbc down genes	no	no	20420713
miR-34a	targets	MYB	tnbc down genes	yes	no	19584398
miR-34b	regulates	MDM2	tnbc down genes	no	no	23314612
miR-34c	regulates	BCL2	tnbc down genes	yes	non small cell lung cancer	24550773
miR-365-2	targets	BCL2	tnbc down genes	no	no	22328513
miR-373	targets	RABEP1	tnbc down genes	yes	no	21271679
miR-375	targets	IGF1R	tnbc down genes	yes	no	24571711, 21813472, 24166096, 25184138, 25501825
miR-375	regulates	MDM2	tnbc down genes	no	no	25307786
miR-378	targets	GALNT7	tnbc down genes	yes	no	19844573
miR-378	targets	IGF1R	tnbc down genes	yes	no	22367207, 23447532
miR-378-3p	targets	PGR	tnbc down genes	no	no	25150622
miR-378a-3p	regulates	IGF1R	tnbc down genes	yes	no	24412052, 25427715
miR-383	targets	IGF1R	tnbc down genes	no	no	23564324
miR-3928	targets	ERBB3	tnbc down genes	no	no	24854843
miR-410	targets	MDM2	tnbc down genes	no	no	25136862
miR-423-5p	targets	TFF1	tnbc down genes	no	no	24486742
miR-424	targets	IGF1R	tnbc down genes	yes	no	24636986
miR-431	regulates	IGF1R	tnbc down genes	no	no	22293894
miR-449a	targets	BCL2	tnbc down genes	yes	no	24248414, 21569010
miR-451	regulates	BCL2	tnbc down genes	yes	no	23886157
miR-453	regulates	ESR1	tnbc down genes	no	no	19028706
miR-470	regulates	IGF1R	tnbc down genes	no	no	21967153
miR-4728-3p	regulates	ESR1	tnbc down genes	no	no	24828673
miR-493	targets	IGF1R	tnbc down genes	no	no	24533778, 22373578
miR-497	targets	BCL2	tnbc down genes	yes	no	21258880, 21878650
miR-503	targets	BCL2	tnbc down genes	yes	no	24931256, 23355742
miR-503	targets	IGF1R	tnbc down genes	yes	no	24931256
miR-509-5p	targets	MDM2	tnbc down genes	no	no	25144722
miR-520a	regulates	ERBB4	tnbc down genes	no	no	24589589
miR-584	targets	FOXA1	tnbc down genes	no	no	22536353
miR-605	targets	MDM2	tnbc down genes	yes	no	24739178, 21217645
miR-630	targets	IGF1R	tnbc down genes	no	no	24655723
miR-631	regulates	SULT1A1	tnbc down genes	no	no	20881232
miR-638	targets	TSPAN1	tnbc down genes	no	no	25301729
miR-660	targets	MDM2	tnbc down genes	yes	no	25501825
miR-661	targets	MDM2	tnbc down genes	no	no	24141721
miR-661	targets	STARD10	tnbc down genes	yes	no	20543867
miR-669b	regulates	IGF1R	tnbc down genes	no	no	21967153
miR-675	regulates	IGF1R	tnbc down genes	no	no	22684254, 23863936
miR-681	regulates	IGF1R	tnbc down genes	no	no	21967153
miR-7	targets	IGF1R	tnbc down genes	yes	no	20819078
miR-708	regulates	BCL2	tnbc down genes	no	no	23754151
miR-885-3p	regulates	BCL2	tnbc down genes	no	no	22071691
miR-92b	regulates	BCL2	tnbc down genes	no	no	24325785
miR-96	targets	PGR	tnbc down genes	no	no	22378788
miR-99	targets	IGF1R	tnbc down genes	yes	no	23724047, 22425712
miR-99a	regulates	IGF1R	tnbc down genes	yes	no	23503464, 24030073, 24410957
miR-145	targets	ARF6	tnbc search	yes	no	25253741
miR-155	targets	RAD51	tnbc search	no	no	24616504
miR-155	regulates	VHL	tnbc search	no	no	23353819
miR-17	targets	LAMA3	tnbc search	yes	no	24863696
miR-17	targets	TIMP2	tnbc search	yes	no	24863696
miR-17	targets	TIMP3	tnbc search	yes	no	24863696
miR-182	targets	PFN1	tnbc search	yes	no	23430586
miR-185	regulates	BRCA1	tnbc search	no	no	25319390
miR-185	targets	DNMT1	tnbc search	yes	no	25319390
miR-185	targets	E2F6	tnbc search	no	no	25319390
miR-193b	regulates	FASN	tnbc search	yes	no	25213330
miR-200	regulates	CDH1	tnbc search	yes	no	24518294, 21501518
miR-200	targets	ZEB1	tnbc search	yes	breast cancer, ovarian cancer, cancer	21501518
miR-200	targets	ZEB2	tnbc search	yes	breast cancer, ovarian cancer, cancer	21501518
miR-200b	targets	PRKCA	tnbc search	no	no	24925028
miR-200b	regulates	RAC1	tnbc search	no	no	24925028
miR-200c	targets	ARHGAP19	tnbc search	yes	no	21501518
miR-200c	regulates	CDH1	tnbc search	yes	no	21501518
miR-200c	targets	FN1	tnbc search	yes	no	21501518
miR-200c	targets	LEPR	tnbc search	yes	no	21501518
miR-200c	targets	MSN	tnbc search	yes	no	21501518
miR-200c	regulates	NTF3	tnbc search	yes	no	23185507
miR-200c	targets	NTRK2	tnbc search	yes	no	23185507, 21501518
miR-200c	regulates	VEGFA	tnbc search	yes	no	25445393
miR-200c	regulates	XIAP	tnbc search	no	no	24821285
miR-200c	targets	ZEB1	tnbc search	yes	breast cancer, ovarian cancer, cancer	21501518
miR-200c	targets	ZEB2	tnbc search	yes	breast cancer, ovarian cancer, cancer	21501518
miR-203	targets	BIRC5	tnbc search	yes	no	22713668
miR-203	targets	LASP1	tnbc search	yes	no	22713668, 22713668
miR-203	targets	RASAL2	tnbc search	no	no	25384218
miR-205	regulates	E2F1	tnbc search	yes	no	22578566
miR-205	regulates	LAMC1	tnbc search	yes	no	22578566
miR-206	targets	CORO1C	tnbc search	no	no	25074552
miR-206	targets	RASA1	tnbc search	no	no	25202123
miR-206	targets	SPRED1	tnbc search	no	no	25202123
miR-21	regulates	BCL2	tnbc search	yes	breast cancer, vascular disease	24606718
miR-21	targets	RASA1	tnbc search	no	no	25202123
miR-21	targets	SPRED1	tnbc search	no	no	25202123
miR-221	targets	CDH1	tnbc search	no	no	23637992
miR-221	regulates	CDKN1B	tnbc search	yes	glioblastoma, hepatocellular carcinoma, malignant melanoma, prostate cancer, acute promyelocytic leukemia, ovarian cancer	23637992
miR-221	regulates	ESR1	tnbc search	yes	breast cancer	23637992
miR-222	regulates	ESR1	tnbc search	yes	breast cancer	23637992
miR-26a	targets	MTDH	tnbc search	yes	no	25434799
miR-31	targets	PRKCE	tnbc search	yes	no	23364795
miR-31	targets	RHOA	tnbc search	yes	breast cancer	22289355
miR-31	targets	WASF3	tnbc search	no	no	22289355
miR-34a	targets	AXL	tnbc search	yes	no	21814748
miR-34a	targets	BCL2	tnbc search	yes	neuroblastoma, non small cell lung cancer, pancreatic cancer, Alzheimer's Disease	24565525
miR-638	targets	BRCA1	tnbc search	no	no	25228385
miR-7	regulates	EGFR	tnbc search	yes	breast cancer, glioblastoma, lung cancer	24707474

## Sheet: TarBase7_for_252_genes
miRNA	Gene	PMID	Extracted by miRTex		Note
hsa-miR-15a-5p	BCL2	16166262	yes		This sheet contains 144 TarBase 7.0 miRNA-gene relations for 252 down-regulated genes in the TNBC use case. These 144 relations have both their miRNA and gene present in the abstract. miRTex coverage on these relations are indicated by the fourth column. The miRNAs are merged into one by if their numbers are the same.
hsa-miR-16-5p	BCL2	16166262	yes
hsa-miR-21-5p	BCL2	17072344	yes
hsa-miR-125a-5p; hsa-miR-125b-5p	ERBB3	17110380	yes
hsa-let-7a-5p	BCL2	17260024	yes
hsa-miR-15a-5p	BCL2	17260024	yes
hsa-miR-206	ESR1	17312270	yes
hsa-miR-15a-5p	BCL2	17707831	yes
hsa-miR-16-5p	BCL2	17707831	yes
hsa-miR-16-5p	BCL2	17877811	yes
hsa-miR-150-5p	MYB	17923094	yes
hsa-miR-15a-5p	BCL2	18362358	yes
hsa-miR-16-5p	BCL2	18362358	yes
hsa-miR-199a-5p	IKBKB	18408758	yes
hsa-miR-15b-5p	BCL2	18449891	yes
hsa-miR-16-5p	BCL2	18449891	yes
hsa-miR-34a-5p	BCL2	18505919	yes
hsa-miR-150-5p	MYB	18667440	yes
hsa-miR-221-3p	ESR1	18790736	yes
hsa-miR-222-3p	ESR1	18790736	yes
hsa-miR-34a-5p; hsa-miR-34b-5p; hsa-miR-34c-5p	BCL2	18803879	yes
hsa-miR-150-5p	MYB	18814950	yes
hsa-miR-15a-5p	MYB	18818396	yes
hsa-miR-205-5p	ERBB3	19238171	yes
hsa-miR-16-5p	BCL2	19269153	yes
hsa-miR-205-5p	ERBB3	19276373	yes
hsa-miR-22-3p	ESR1	19414598	yes
hsa-miR-1	BCL2	19506341	yes
hsa-miR-34a-5p	MYB	19584398	yes
hsa-miR-153	BCL2	19676043	yes
hsa-miR-34a-5p	BCL2	19683563	yes
hsa-miR-18a-5p; hsa-miR-18b-5p	ESR1	19684618	yes
hsa-miR-193b-3p	ESR1	19684618	yes
hsa-miR-206	ESR1	19684618	yes
hsa-miR-302c-3p	ESR1	19684618	yes
hsa-miR-133b	IGF1R	19695767	yes
hsa-miR-18a-5p	ESR1	19706389	yes
hsa-miR-19b-3p	ESR1	19706389	yes
hsa-miR-20b-5p	ESR1	19706389	yes
hsa-miR-122-5p	IGF1R	19726678	yes
hsa-miR-125b-5p	BMPR1B	19738052	yes
hsa-miR-143-3p	BCL2	19843160	yes
hsa-miR-378a-3p; hsa-miR-378a-3p	GALNT7	19844573	yes
hsa-miR-223-3p	RHOB	19850724	yes
hsa-miR-29a-3p; hsa-miR-29b-3p; hsa-miR-29c-3p	BCL2	20041405	yes
hsa-miR-21-5p	BCL2	20048743	yes
hsa-miR-18a-5p	ESR1	20080637	yes
hsa-miR-19a-3p	ESR1	20080637	yes
hsa-miR-181a-5p; hsa-miR-181b-5p; hsa-miR-181c-5p; hsa-miR-181d	BCL2	20162574	yes
hsa-miR-483-3p	BBC3	20388800	yes
hsa-miR-21-5p	RHOB	20460403	yes
hsa-miR-296-5p	BCL2	20485139	yes
hsa-miR-661	STARD10	20543867	yes
hsa-miR-16-5p	BCL2	20643754	yes
hsa-miR-155-5p	MYB	20680360	yes
hsa-miR-195-5p	BCL2	20727858	yes
hsa-miR-7-5p	IGF1R	20819078	yes
hsa-miR-15a-5p	BCL2	20876285	yes
hsa-miR-16-5p	BCL2	20876285	yes
hsa-miR-125b-5p	BBC3	20886540	yes
hsa-miR-218-5p	IKBKB	20933503	yes
hsa-miR-155-5p	MYB	21062812	yes
hsa-miR-424-5p	MYB	21062812	yes
hsa-miR-15a-5p	BBC3	21205967	yes
hsa-miR-16-5p	BBC3	21205967	yes
hsa-miR-605	MDM2	21217645	yes
hsa-miR-373-3p	RABEP1	21271679	yes
hsa-miR-204-5p	BCL2	21282569	yes
hsa-miR-21-5p	RHOB	21347332	yes
hsa-miR-34a-5p	BCL2	21399894	yes
hsa-miR-148a-3p	BCL2	21455217	yes
hsa-miR-24-2-5p	BCL2	21463514	yes
hsa-miR-126-3p	PGR	21526342	yes
hsa-miR-449a	BCL2	21569010	yes
hsa-miR-26a-5p	ESR1	21610700	yes
hsa-miR-296-5p	BBC3	21633093	yes
hsa-miR-365a-3p	BCL2	21640710	yes
hsa-miR-99a-5p	IGF1R	21687694	yes
hsa-miR-488-5p	AR	21710544	yes
hsa-miR-130a-3p	ESR1	21712254	yes
hsa-miR-7-5p	BCL2	21750649	yes
hsa-miR-21-5p	RHOB	21872591	yes
hsa-miR-181a-5p	BCL2	21958558	yes
hsa-miR-200b-3p; hsa-miR-200c-3p	BCL2	21993663	yes
hsa-miR-365a-3p	BCL2	22072615	yes
hsa-miR-223-3p	IGF1R	22073238	yes
hsa-miR-143-3p	BCL2	22160209	yes
hsa-miR-181d	BCL2	22207524	yes
hsa-miR-181a-5p	BCL2	22285729	yes
hsa-miR-125b-5p	BCL2	22293115	yes
hsa-miR-143-3p	MDM2	22330136	yes
hsa-miR-145-5p	MDM2	22330136	yes
hsa-miR-124-3p	AR	22386953	yes
hsa-miR-25-3p	MDM2	22431589	yes
hsa-miR-32-5p	MDM2	22431589	yes
hsa-miR-22-3p	ERBB3	22484852	yes
hsa-miR-200c-3p	IKBKB	22569286	yes
hsa-miR-139-5p	IGF1R	22580051	yes
hsa-miR-181a-5p; hsa-miR-181b-5p	BCL2	22610076	yes
hsa-miR-7-5p	IGF1R	22614005	yes
hsa-miR-376a-3p	IGF1R	22747855	yes
hsa-miR-182-5p	BCL2	22848417	yes
hsa-miR-204-5p	BCL2	22892391	yes
hsa-miR-148a-3p	IGF1R	22935141	yes
hsa-miR-152	IGF1R	22935141	yes
hsa-miR-136-5p	BCL2	22967897	yes
hsa-miR-122-5p	IGF1R	23056576	yes
hsa-miR-124-3p	AR	23069658	yes
hsa-miR-196b-5p	BCL2	23293219	yes
hsa-miR-21-5p	RHOB	23313253	yes
hsa-miR-18b-5p	MDM2	23365201	yes
hsa-miR-185-5p	AR	23417242	yes
hsa-miR-17-3p	GALNT7	23418359	yes
hsa-miR-34c-5p	MAPT	23423488	yes
hsa-miR-181b-5p	IGF1R	23431408	yes
hsa-miR-497-5p	IGF1R	23453369	yes
hsa-miR-33a-3p; hsa-miR-33a-5p	NRIP1	23547260	yes
hsa-miR-638	OSCP1	23554459	yes
hsa-let-7a-5p	IGF1R	23974362	yes
hsa-miR-429	BCL2	23999873	yes
hsa-miR-181a-5p	BCL2	24335172	yes
hsa-miR-503	BCL2	24931256	yes
hsa-miR-503	IGF1R	24931256	yes
hsa-miR-34a-5p	BCL2	17656095	no
hsa-miR-150-5p	MYB	18539114	no
hsa-miR-17-5p	BCL2	19666108	no
hsa-miR-20a-5p	BCL2	19666108	no
hsa-miR-221-3p	BBC3	20813046	no
hsa-miR-222-3p	BBC3	20813046	no
hsa-miR-451a	BCL2	20816946	no
hsa-miR-15a-5p	MYB	21205891	no
hsa-miR-16-5p	MYB	21205891	no
hsa-miR-630	BCL2	21274007	no
hsa-miR-301a-3p	BBC3	21393507	no
hsa-miR-21-5p	BCL2	21468550	no
hsa-miR-335-5p	IGF1R	21618216	no
hsa-miR-100-5p	IGF1R	21643012	no
hsa-miR-221-3p	ESR1	21761362	no
hsa-miR-22-3p	ESR1	21761362	no
hsa-miR-29a-3p	ESR1	21761362	no
hsa-miR-429	BCL2	21993663	no
hsa-miR-181a-5p	BCL2	22209977	no
hsa-miR-223-3p	RHOB	23094093	no
hsa-miR-223-3p	BCL2	23208072	no

## Sheet: miR2Disease
miRNA	Gene	PMID	Extracted by miRTex		Note
7	ras	16651716	yes		This sheet contains 329 miR2Disease miRNA-gene relations. These 329 relations have both their miRNA and gene present in the abstract. miRTex coverage on these relations are indicated by the fourth column. The miRNAs are merged into one by if their numbers are the same.
127	bcl6	16766263	yes
133	nelf-a/whsc2	17468766	yes
24	p protein	17613256	yes
93	p protein	17613256	yes
93	l protein	17613256	yes
24	l protein	17613256	yes
222	p27	18246122	yes
222	kip1	18246122	yes
222	c-kit	18417445	yes
221	c-kit	18417445	yes
221	cdkn1b/p27	18521080	yes
221	cdkn1c/p57	18521080	yes
203	bcr-abl1	18538733	yes
7	prdm1/blimp-1	18583325	yes
9	prdm1/blimp-1	18583325	yes
510	htr3e	18614545	yes
222	p27	18708351	yes
222	kip1	18708351	yes
26	ezh2	18713946	yes
16	bcl2	18942116	yes
221	c-kit	18983236	yes
222	c-kit	18983236	yes
21	spry1	19043405	yes
192	cdkn1a/p21	19074875	yes
215	cdkn1a/p21	19074875	yes
221	c-kit	19126397	yes
21	pdcd4	19419954	yes
181	cdx2	19585654	yes
206	c-met	19710019	yes
128	af4-mll	19749093	yes
7	hmga2	17322030	yes
141	zeb1	18376396	yes
34	notch-2	19773441	yes
34	e2f3	18942116	yes
15	bcl2	17260024	yes
155	tp53inp1	17911264	yes
143	fndc3b	19472311	yes
19	pten	18460397	yes
7	hmga2	18413822	yes
212	zo-1	18162065	yes
429	zeb1	18376396	yes
128	egfr	18304967	yes
25	p57	19153141	yes
15	ccne1	19135980	yes
93	e2f1	18328430	yes
21	p53	19843843	yes
34	c-met	19006648	yes
129	galnt1	19487295	yes
93	p21	19153141	yes
125	bak1	18056640	yes
15	ras	17260024	yes
9	e-cadherin	19572217	yes
133	rhoa	17468766	yes
21	pdcd4	19013014	yes
200	zeb1	18376396	yes
199	met	18456660	yes
93	tp53inp1	18974142	yes
205	zeb1	18376396	yes
214	pten	18199536	yes
98	hmga2	17222355	yes
98	fus1	19671678	yes
193	upa	19701247	yes
27	myt-1	18006846	yes
222	p57	19153141	yes
21	reck	18591254	yes
7	hmga2	18403645	yes
328	abcg2	19270061	yes
16	cdk2	19738602	yes
17	proapoptotic protein bim	18327259	yes
126	plk2	18832181	yes
7	nirf	19818775	yes
183	ezrin	18840437	yes
222	p27kip1	17569667	yes
223	mef2c	18278031	yes
206	met	19620785	yes
21	btg2	19546886	yes
21	pdcd4	17991735	yes
130	tp53inp1	18974142	yes
141	zeb1	18483486	yes
205	her3	19276373	yes
330	e2f1	19597470	yes
1	c-met	19710019	yes
17	ctgf	16878133	yes
143	kras	19137007	yes
21	timp3	18591254	yes
21	pdcd4	17968323	yes
196	s100a9	19342367	yes
200	tubb3	19435871	yes
138	htert	18201269	yes
200	sip1	18376396	yes
221	kip1	18246122	yes
197	fus1	19671678	yes
7	myc	17942906	yes
128	af4	19749093	yes
146	brca1	18660546	yes
1	mef2a	19188439	yes
107	plag1	19692702	yes
373	lats2	19501585	yes
196	hoxa7	19418581	yes
20	bmpr2	19390056	yes
34	bcl2	18505919	yes
17	e2f1	18521848	yes
143	erk5	19464056	yes
21	reck	18794849	yes
133	krt7	19378336	yes
199	erk2	18456660	yes
328	bace1	18986979	yes
7	igf-ii	17974952	yes
181	gata6	19585654	yes
203	abl1	18538733	yes
424	plag1	19692702	yes
129	sox4	19487295	yes
155	rhoa	18794355	yes
101	atxn1	18758459	yes
200	zeb2	18411277	yes
122	srf	19726678	yes
122	bcl-w	18692484	yes
196	hoxc8	19418581	yes
221	p27kip1	17569667	yes
370	map3k8	17621267	yes
298	bace1	18986979	yes
196	hoxd8	19418581	yes
204	meis1	18308931	yes
143	dnmt3a	19638978	yes
17	bmpr2	19390056	yes
34	c-met	19773441	yes
27	prohibitin	18789835	yes
128	dcx	19713529	yes
126	p85beta	18663744	yes
196	hoxb8	19418581	yes
7	ras	17260024	yes
17	pkd2	19821056	yes
9	nf-kappab1	19702828	yes
155	agtr1	17668390	yes
196	sprr2c	19342367	yes
7	bcl2	17260024	yes
7	hmga2	17957144	yes
182	foxo1	19574223	yes
181	plag1	19692702	yes
126	irs-1	18834857	yes
34	e2f3	17297439	yes
205	deltaef1	18376396	yes
96	foxo1	19574223	yes
23	upa	19490101	yes
9	corest	19118166	yes
101	fos	19133651	yes
21	pten	19672202	yes
218	lamb3	17998940	yes
133	pkm2	18464261	yes
221	p27	18246122	yes
133	mcl-1	19654003	yes
128	reelin	19713529	yes
181	nlk	19585654	yes
7	hmga2	17437991	yes
451	mif	19318487	yes
128	mll-af4	19749093	yes
21	marcks	19302977	yes
34	notch-1	19773441	yes
107	bace1	18234899	yes
512	mcl-1	19503096	yes
433	fgf20	18252210	yes
224	api-5	18319255	yes
214	jnk1	19859982	yes
34	mycn	18505919	yes
222	sod2	19487542	yes
222	p27	19153141	yes
204	hoxa10	18308931	yes
34	cdk6	19773441	yes
7	pak1	18922890	yes
15	c-myb	18818396	yes
200	deltaef1	18376396	yes
127	bcl6	18942116	yes
196	krt5	19342367	yes
21	pdcd4	18372920	yes
320	tfr-1	19135902	yes
145	igf-ir	19391107	yes
429	deltaef1	18376396	yes
221	p27	19153141	yes
100	plk1	19739117	yes
101	mcl-1	19155302	yes
27	zbtb10	18006846	yes
192	mip-2 alpha	18835392	yes
126	hoxa9	18474618	yes
19	socs-1	18728182	yes
21	pdcd4	18270520	yes
7	hmga2	17600087	yes
141	deltaef1	18376396	yes
200	zeb1	18411277	yes
21	tpm1	18270520	yes
29	bace1	18434550	yes
21	cdc25a	19826040	yes
7	caspase-3	18758960	yes
15	ccnd1	18931683	yes
196	anxa1	18663355	yes
146	mmp16	19265686	yes
15	bcl2	18449891	yes
10	ppar-alpha	19780876	yes
204	mcl-1	19070389	yes
205	ship2	19033458	yes
221	p27	18708351	yes
16	bcl2	17260024	yes
141	sip1	19830559	yes
223	stmn1	18555017	yes
221	p27	19126397	yes
21	tgf-beta	18829576	yes
222	p27kip1	18417445	yes
1	calmodulin	19188439	yes
133	cdc42	17468766	yes
17	aib1	16940181	yes
141	zeb2	18376396	yes
1	hdac4	18593903	yes
34	c-myc	18802929	yes
222	cdkn1b	18417445	yes
429	zeb2	18376396	yes
16	ras	17260024	yes
449	hdac-1	19252524	yes
17	pten	18327259	yes
221	kip1	18708351	yes
146	brca2	18660546	yes
221	p57	19153141	yes
122	igf1r	19726678	yes
34	c-met	19029026	yes
221	p27kip1	18417445	yes
23	c-met	19490101	yes
521	csa	18668526	yes
16	ccnd1	18483394	yes
7	nf2	17220301	yes
145	irs-1	19391107	yes
106	e2f1	18521848	yes
30	krt7	19378336	yes
16	wnt3a	18931683	yes
17	vimentin	19771525	yes
106	p21	19153141	yes
221	cdkn1b	19749093	yes
130	atxn1	18758459	yes
205	zeb2	18376396	yes
140	hdac4	19734943	yes
214	mek3	19859982	yes
200	zeb1	18483486	yes
200	zeb2	19854497	yes
133	bcl2l2	19654003	yes
15	wnt3a	18931683	yes
21	pdcd4	19276261	yes
146	cfh	19540598	yes
221	bmf	19671867	yes
106	e2f1	18328430	yes
16	bcl2	18449891	yes
1	foxp1	18593903	yes
222	mmp1	19487542	yes
199	hes1	19308264	yes
1	met	18593903	yes
16	cdk1	19738602	yes
21	pdcd4	19682430	yes
16	ccnd1	18931683	yes
128	e2f3a	18810376	yes
34	sirt1	18834855	yes
200	zeb1	19854497	yes
200	bmi1	19665978	yes
141	sip1	18376396	yes
29	b7-h3	19584290	yes
17	tsp1	16878133	yes
1	kcnj2	17401374	yes
21	lrrfip1	19559015	yes
200	zfhx1b	18942116	yes
1	kir2.1	19775284	yes
143	erk5	17892514	yes
21	pten	18460397	yes
221	cdkn1b	18417445	yes
124	cdk6	19435910	yes
429	sip1	18376396	yes
320	mcl-1	19070389	yes
19	atxn1	18758459	yes
200	zeb2	18376396	yes
10	usf2	19074828	yes
320	hsp20	19380620	yes
205	sip1	18376396	yes
29	yy1	18977326	yes
1	gata4	19188439	yes
27	foxo1	19574223	yes
26	pten	19487573	yes
34	notch1	18942116	yes
9	rest	19118166	yes
128	mll	19749093	yes
34	creb	19258499	yes
21	pten	17681183	yes
221	kip1	19126397	yes
125	eif4ebp1	17891175	yes
101	ezh2	19258506	yes
7	hmga2	17243163	yes
146	nf-kappab	18504431	yes
1	hand2	15951802	yes
93	fus1	19671678	yes
122	ampk	16459310	no
7	c-myc	16651716	no
21	pten	16762633	no
9	onecut-2	16831872	no
21	pten	17478730	no
34	bcl2	17656095	no
373	lats2	17695719	no
372	lats2	17695719	no
34	e2f	17875987	no
29	dnmt3a	17890317	no
7	ras	17891175	no
126	prostein	18193184	no
221	kit	18246122	no
222	kit	18246122	no
21	maspin	18270520	no
7	ras	18308936	no
7	hmga2	18308936	no
29	laminin gamma1	18390668	no
326	gli1	18756266	no
324	gli1	18756266	no
125	gli1	18756266	no
221	birc1	18759060	no
21	hnrpk	18829576	no
21	tap63	18829576	no
144	klfd	18941117	no
296	hgs	18977327	no
106	itch	19096009	no
509	ntrk3	19370765	no
485	ntrk3	19370765	no
765	ntrk3	19370765	no
128	ntrk3	19370765	no
124	rb	19435910	no
145	klf5	19542014	no
200	zeb1	19839049	no
200	zeb2	19839049	no
125	arid3b	19881956	no
